# Supplementary material for: Biophysical and proteomic analyses suggest functions of Pseudomonas syringae pv tomato DC3000 extracellular vesicles in bacterial growth during plant infection
Source: bioRxiv or medRxiv preprint supplement (doi:10.1101/2021.02.08.430144), 2021-02-08
Supplement: Supplementary file [file media-1.pdf]

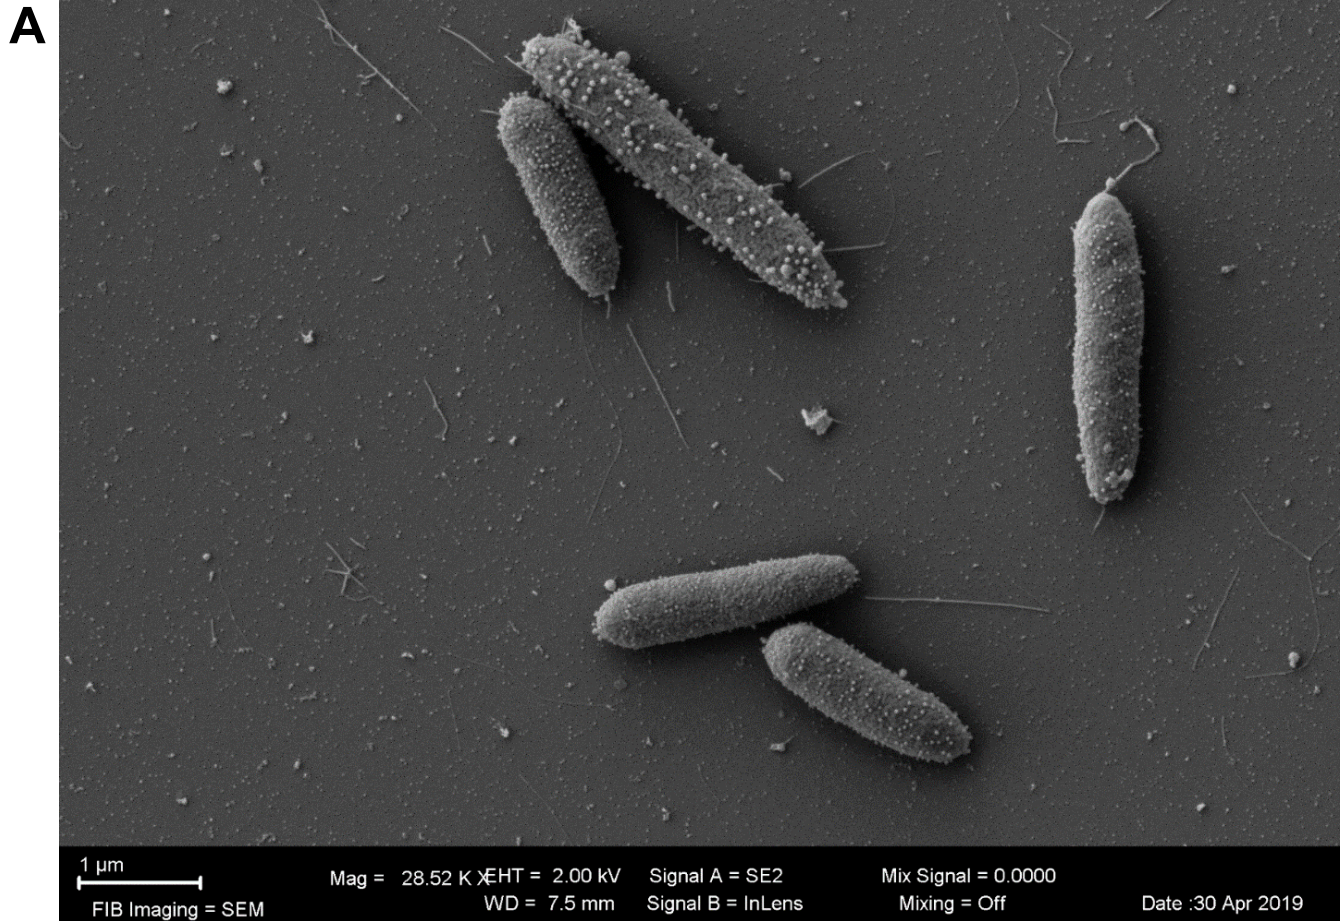

**B**

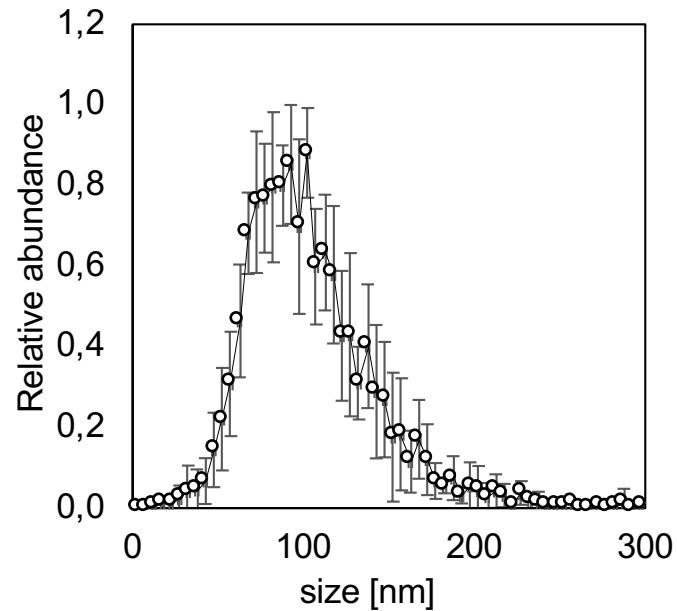

**Figure S1.** **A)** The full-size SEM micrograph used in Fig. 1A of *Pto* DC3000 growth in planktonic culture ( $OD_{600} = 3-4$ ). **B)** Size profile of EVs from *Pto* DC3000 planktonic cultures in fluid samples ( $OD_{600} = 7.5-11$ ).

Figure S2

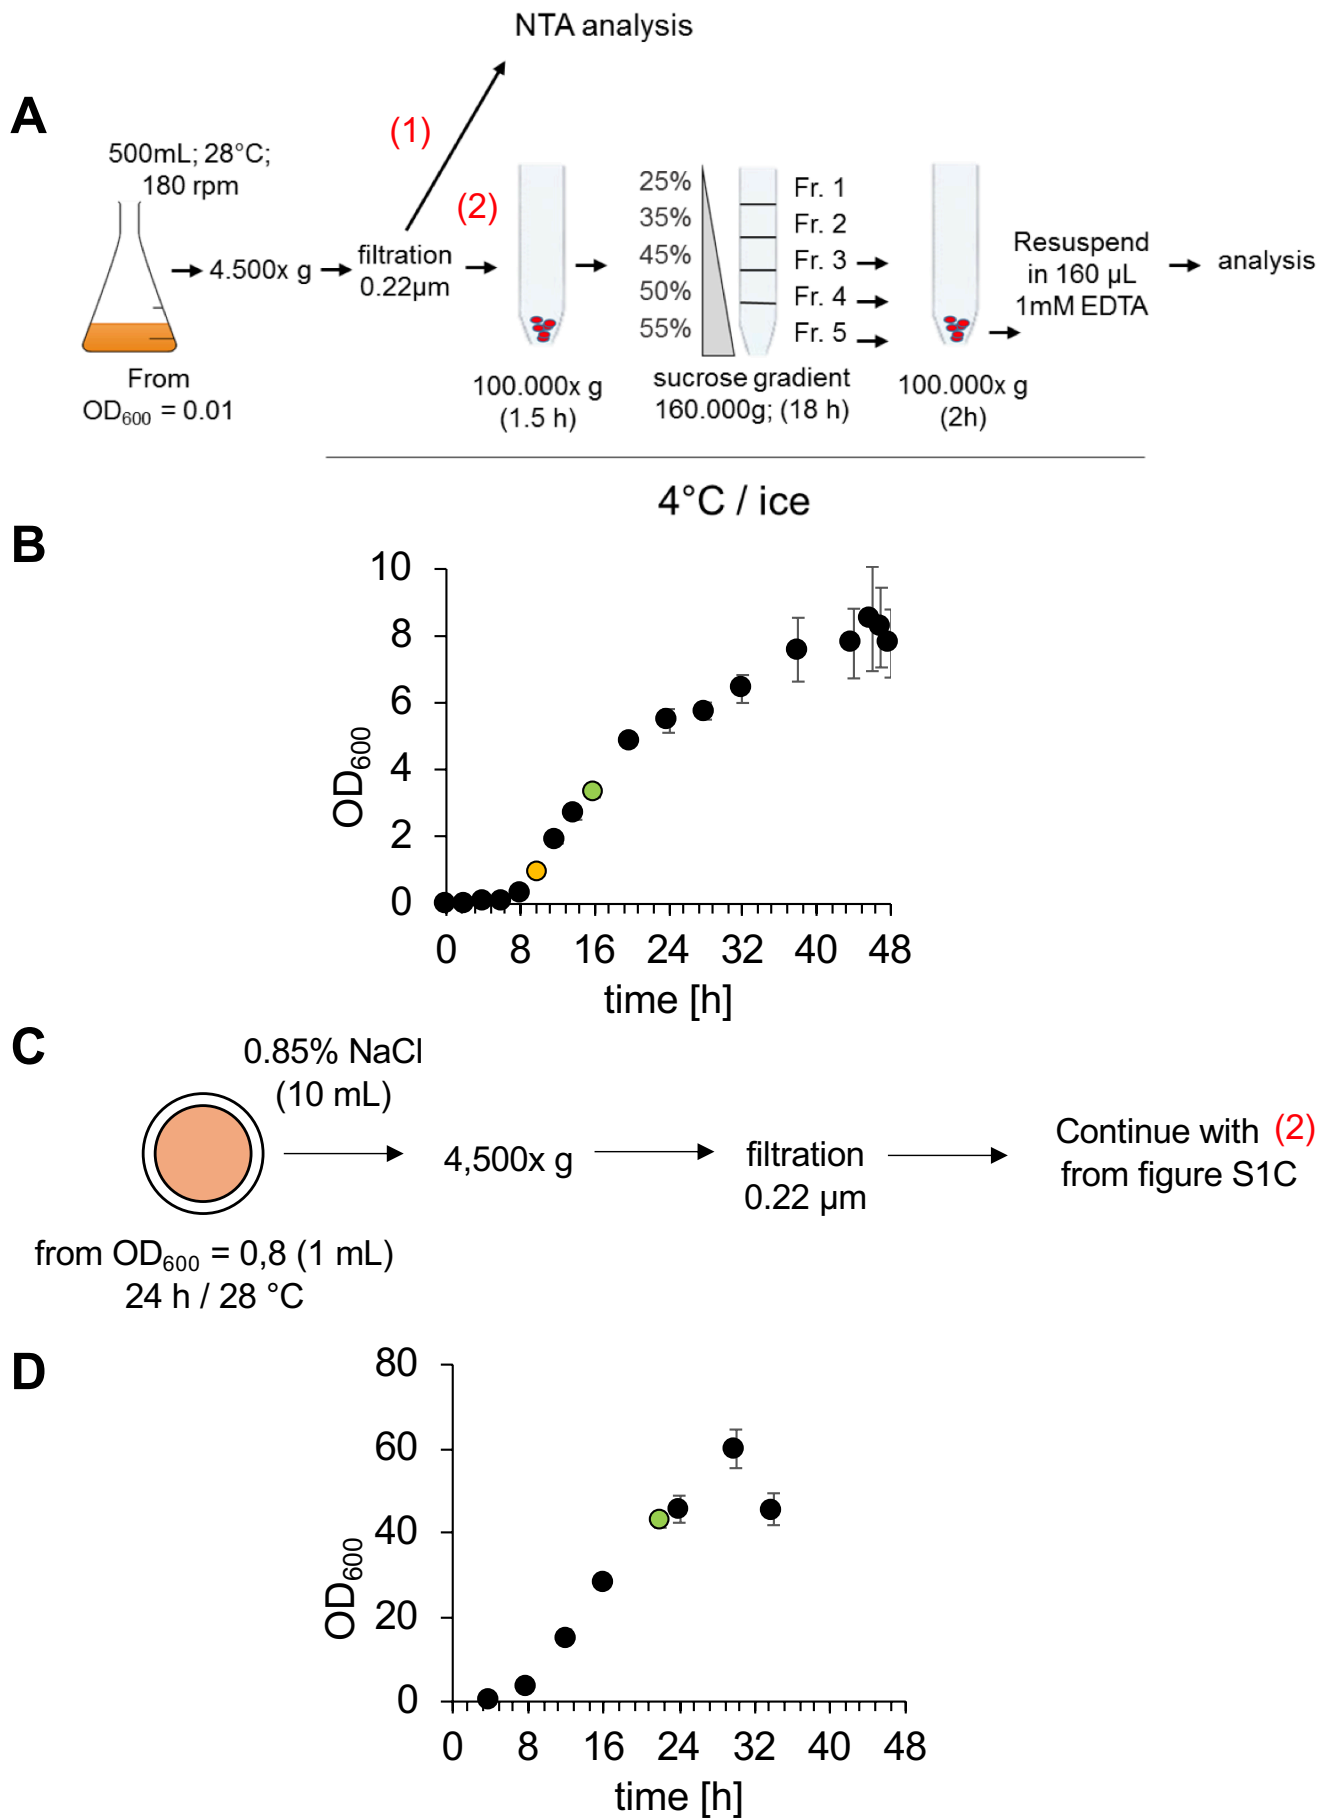

**Figure S2. Isolation of *Pto* DC3000 EVs.** **A)** Schematic overview of EVs isolation from planktonic cultures for fluid sample (1) and gradient enriched sample (2) analysis. **B)** Growth measurements of planktonic *Pto* DC3000 cultures. Orange indicates EV isolation from early exponential growth stages ( $OD_{600} = 1-2$ ); green indicates EV isolation from late exponential growth stages ( $OD_{600} = 3-4$ ). **C)** Schematic overview of EVs isolation from biofilm cultures. **D)** Growth measurements of biofilm *Pto* DC3000 cultures. The green dot represents the growth stage from which the bacteria were used for experiments.

Figure S3

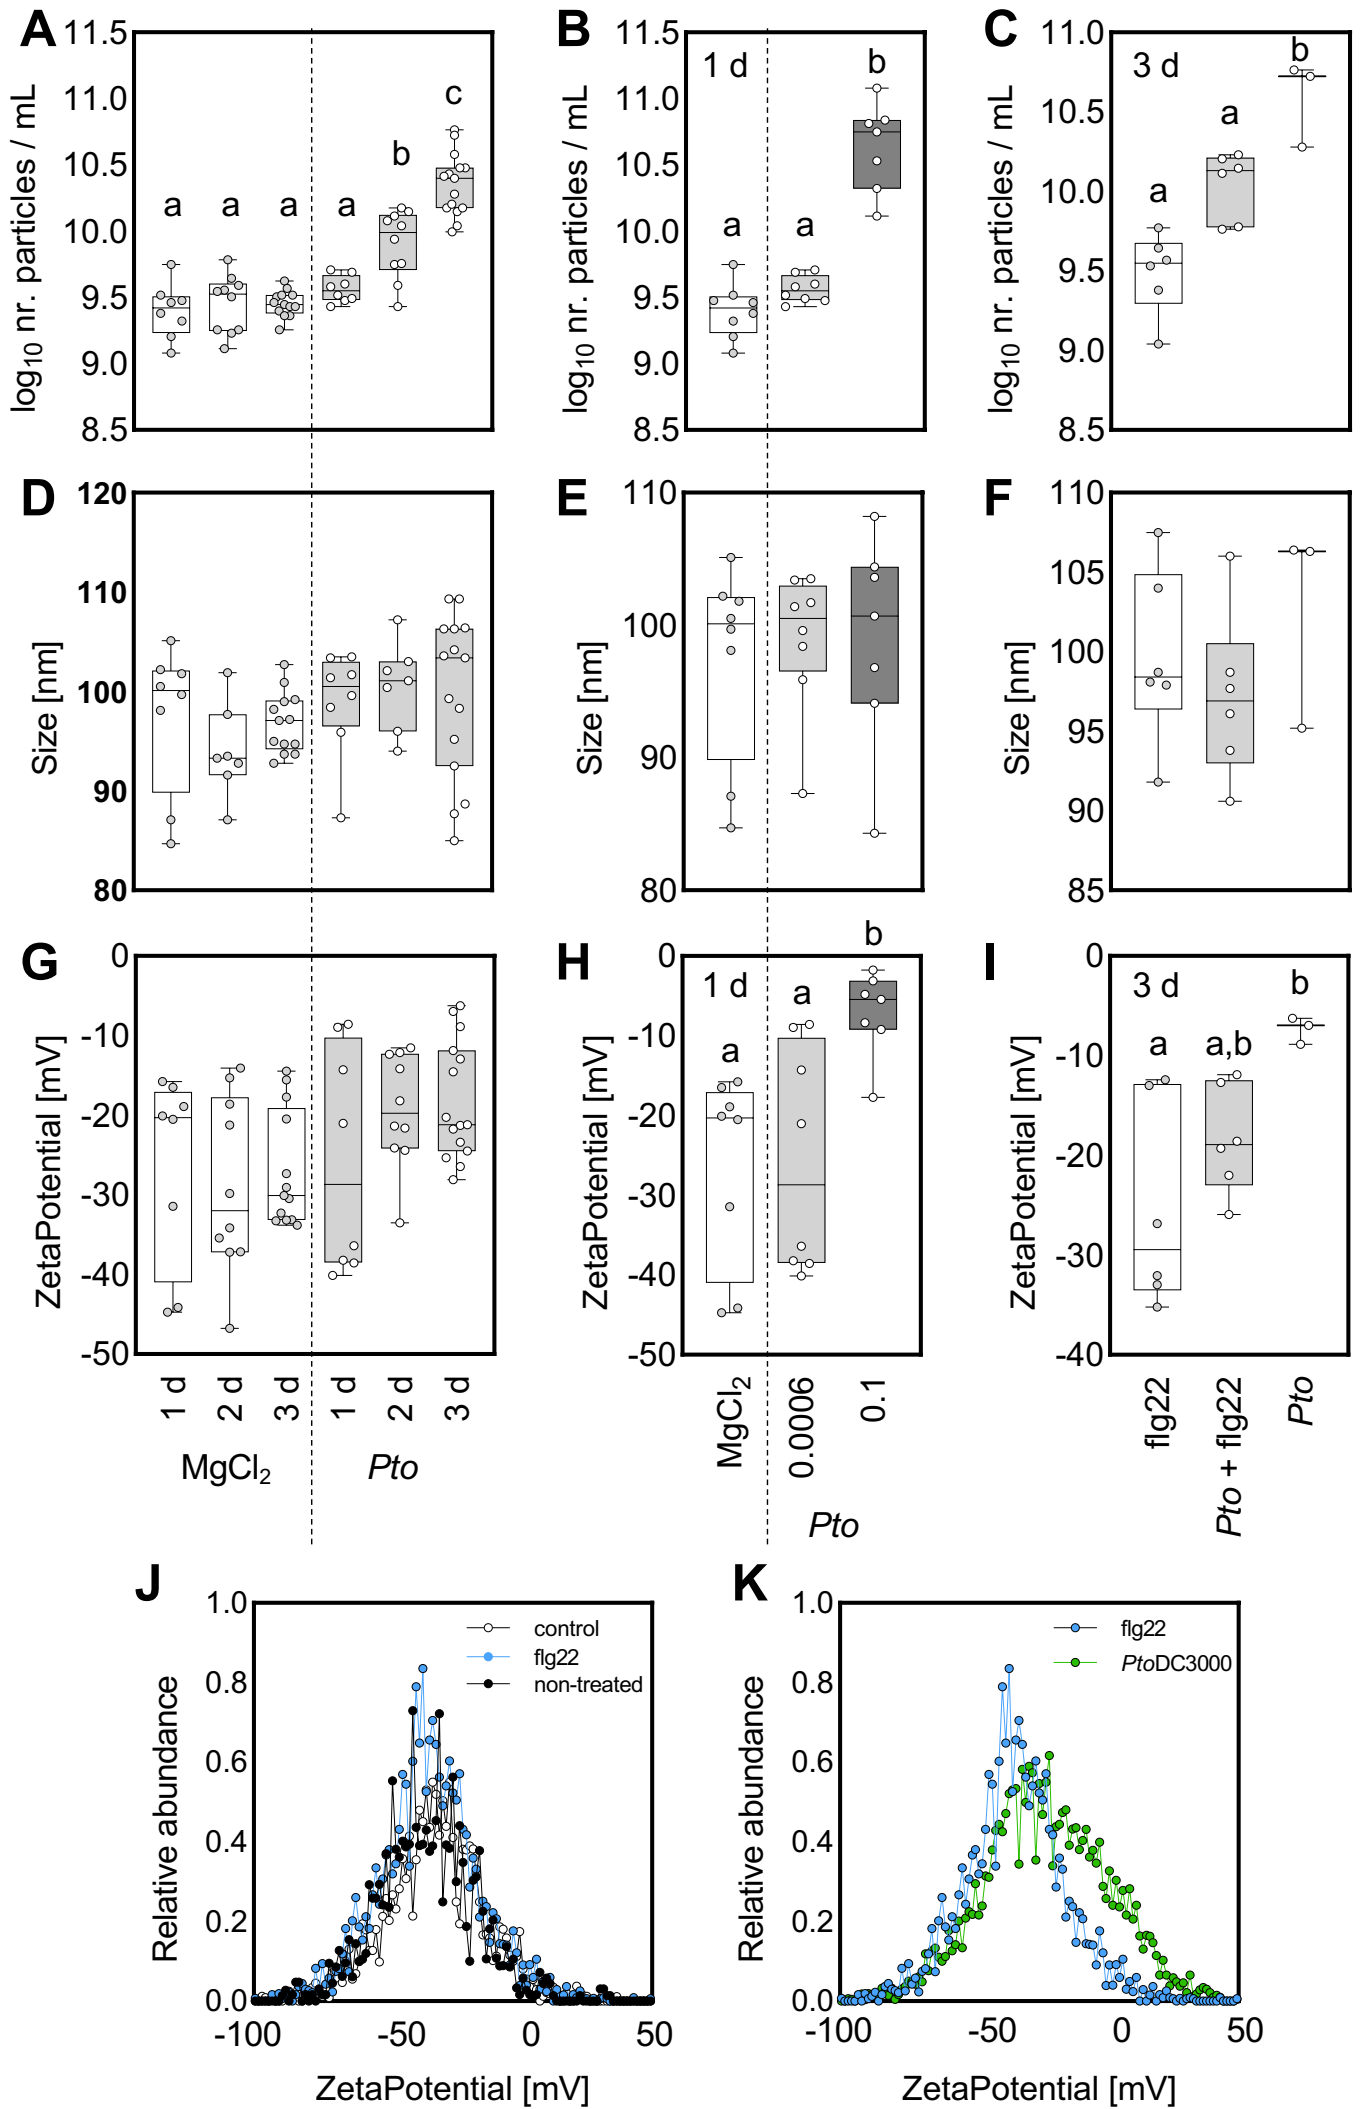

**Figure S3. Biophysical parameters of particles in apoplastic fluids from *A. thaliana* plants infected with *Pto* DC3000.** **A, D, G)** Particle parameters over days post infection (dpi). **B, E, H)** Particle parameters in response to inoculation with different *Pto* DC3000 densities. **C, F, I)** Particle parameters in response to inoculation with different *Pto* DC3000 and co-treatment with flg22. Each dot represents value of independent samples for size and  $\zeta$ -potential it represents median. 3-12 independent samples were used for each experiment. **J, K)** The profile of  $\zeta$ -potential for each particle collected from apoplastic fluids of plants treated as indicated and gradient enriched EVs. Control = 0.2 mM EDTA; flg22 = 100 nM; n.t. = not treated; *Pto* DC3000 OD<sub>600</sub> = 0.0006. Each treatment was 3 days long. The dots represent the mean across the  $\zeta$ -potential values from independent samples: n = 8 (control); n = 10 (*Pto* DC3000); n = 6 (flg22); n = 4 (non-treatment).

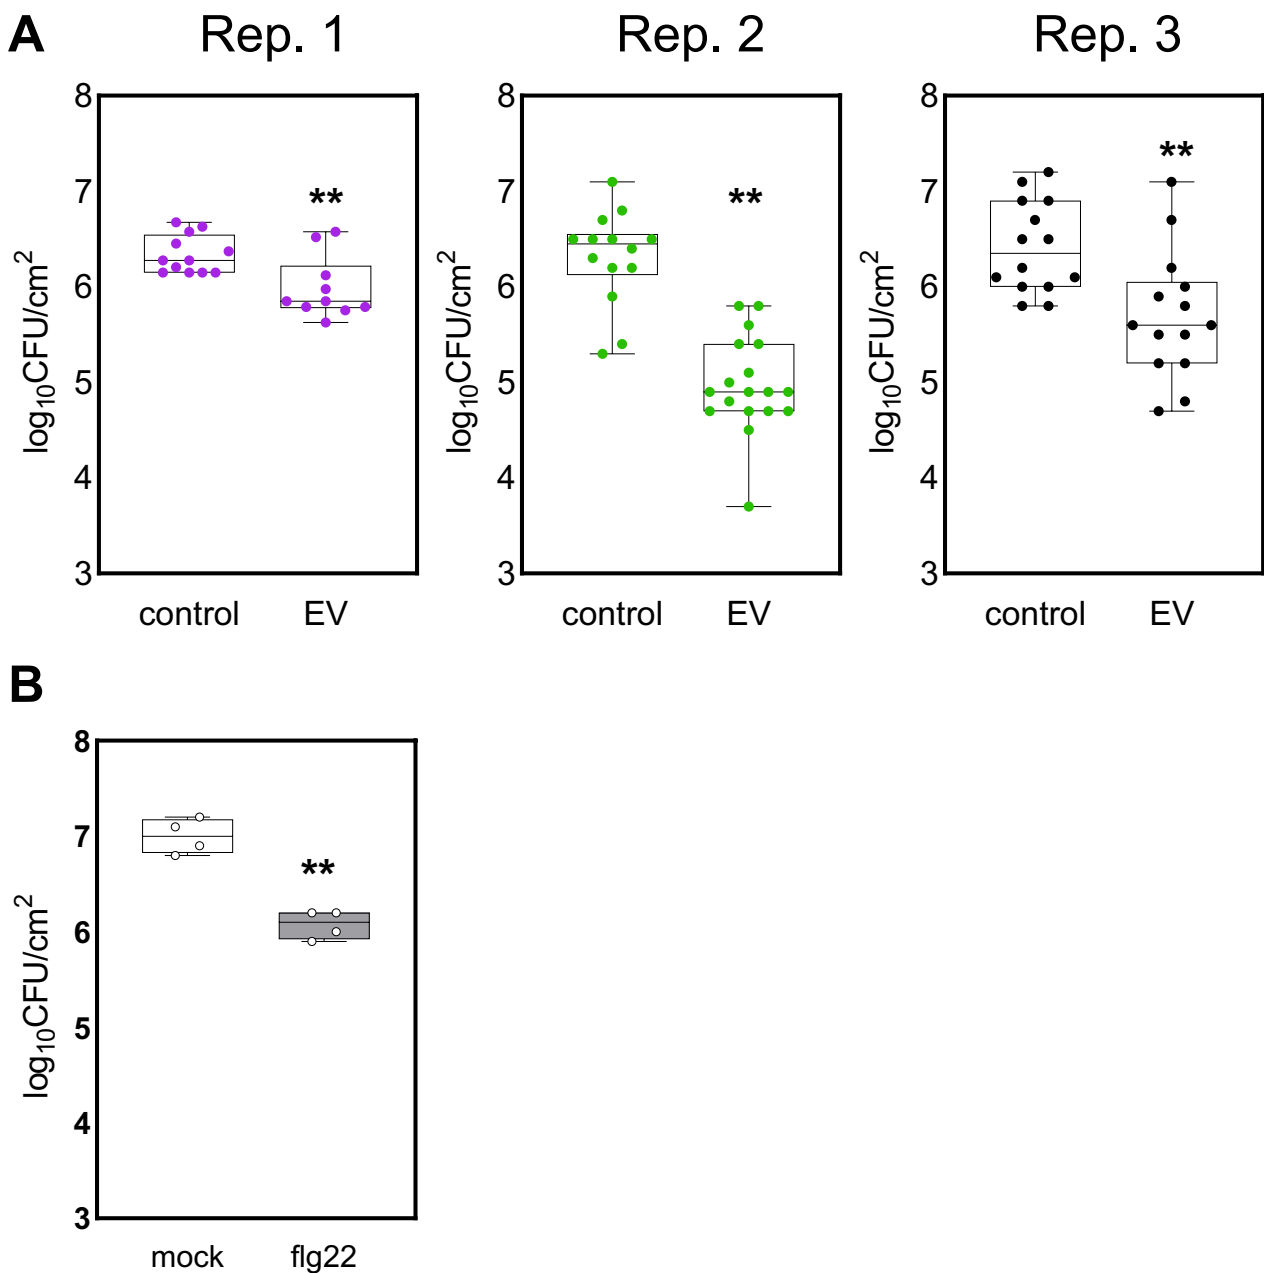

**Figure S4. Pre-treatment with *Pto* DC3000 EVs induces resistance against subsequent *Pto* DC3000 infection.** **A)** Three individual biological repeats of *Pto* DC3000 growth (CFU) after infection into leaves of *A. thaliana* without and with EV pre-treatment at 3 dpi (control = 0.02 mM EDTA). Each biological repeat consists of 12 independent samples. **B)** *Pto* DC3000 growth (CFU) after infection (3 dpi) into leaves of *A. thaliana* without and with 100 nM flg22 1 day pre-treatment (mock = 10 mM MgCl<sub>2</sub>) n = 4. Asterisks represent the statistical difference between the treated and control samples (two tailed Student t-test p < 0.01).

**A**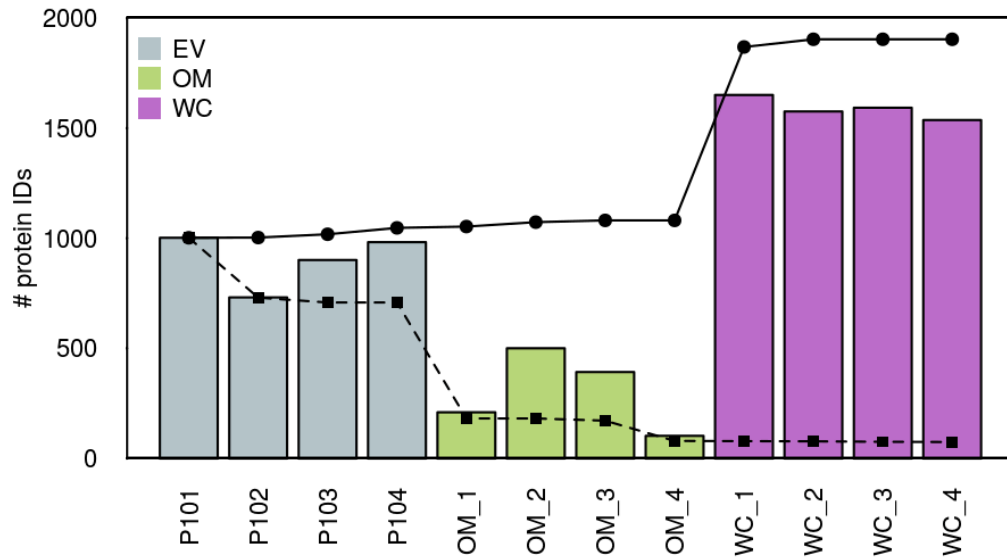**B**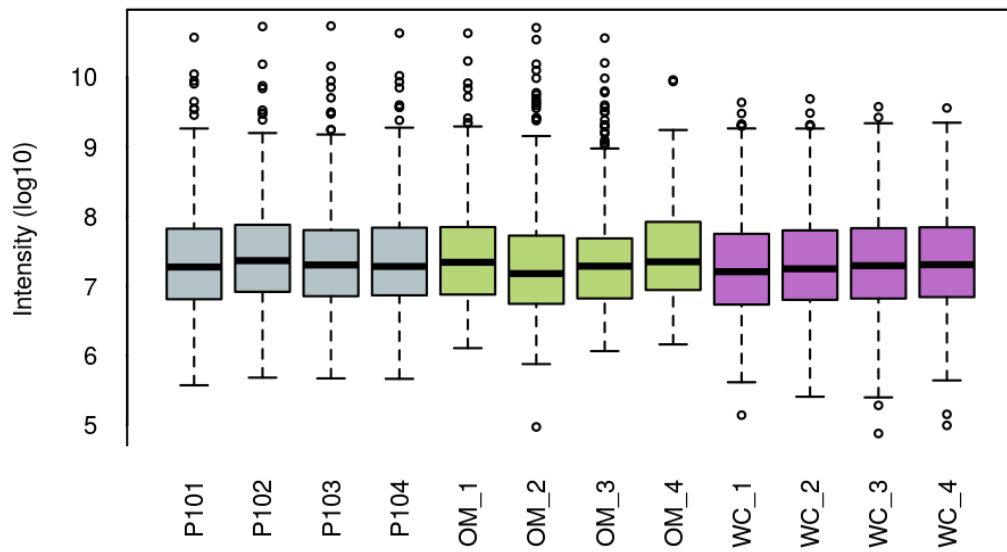

**Figure S5. Characteristics of the proteomic analysis. A)** Barplot shows the number of identified proteins in each replicate. The solid line indicates the cumulative protein IDs and dashed line shows the shared protein IDs. **B)** Boxplot shows a comparable distribution of protein intensities from each replicate.

Figure S6

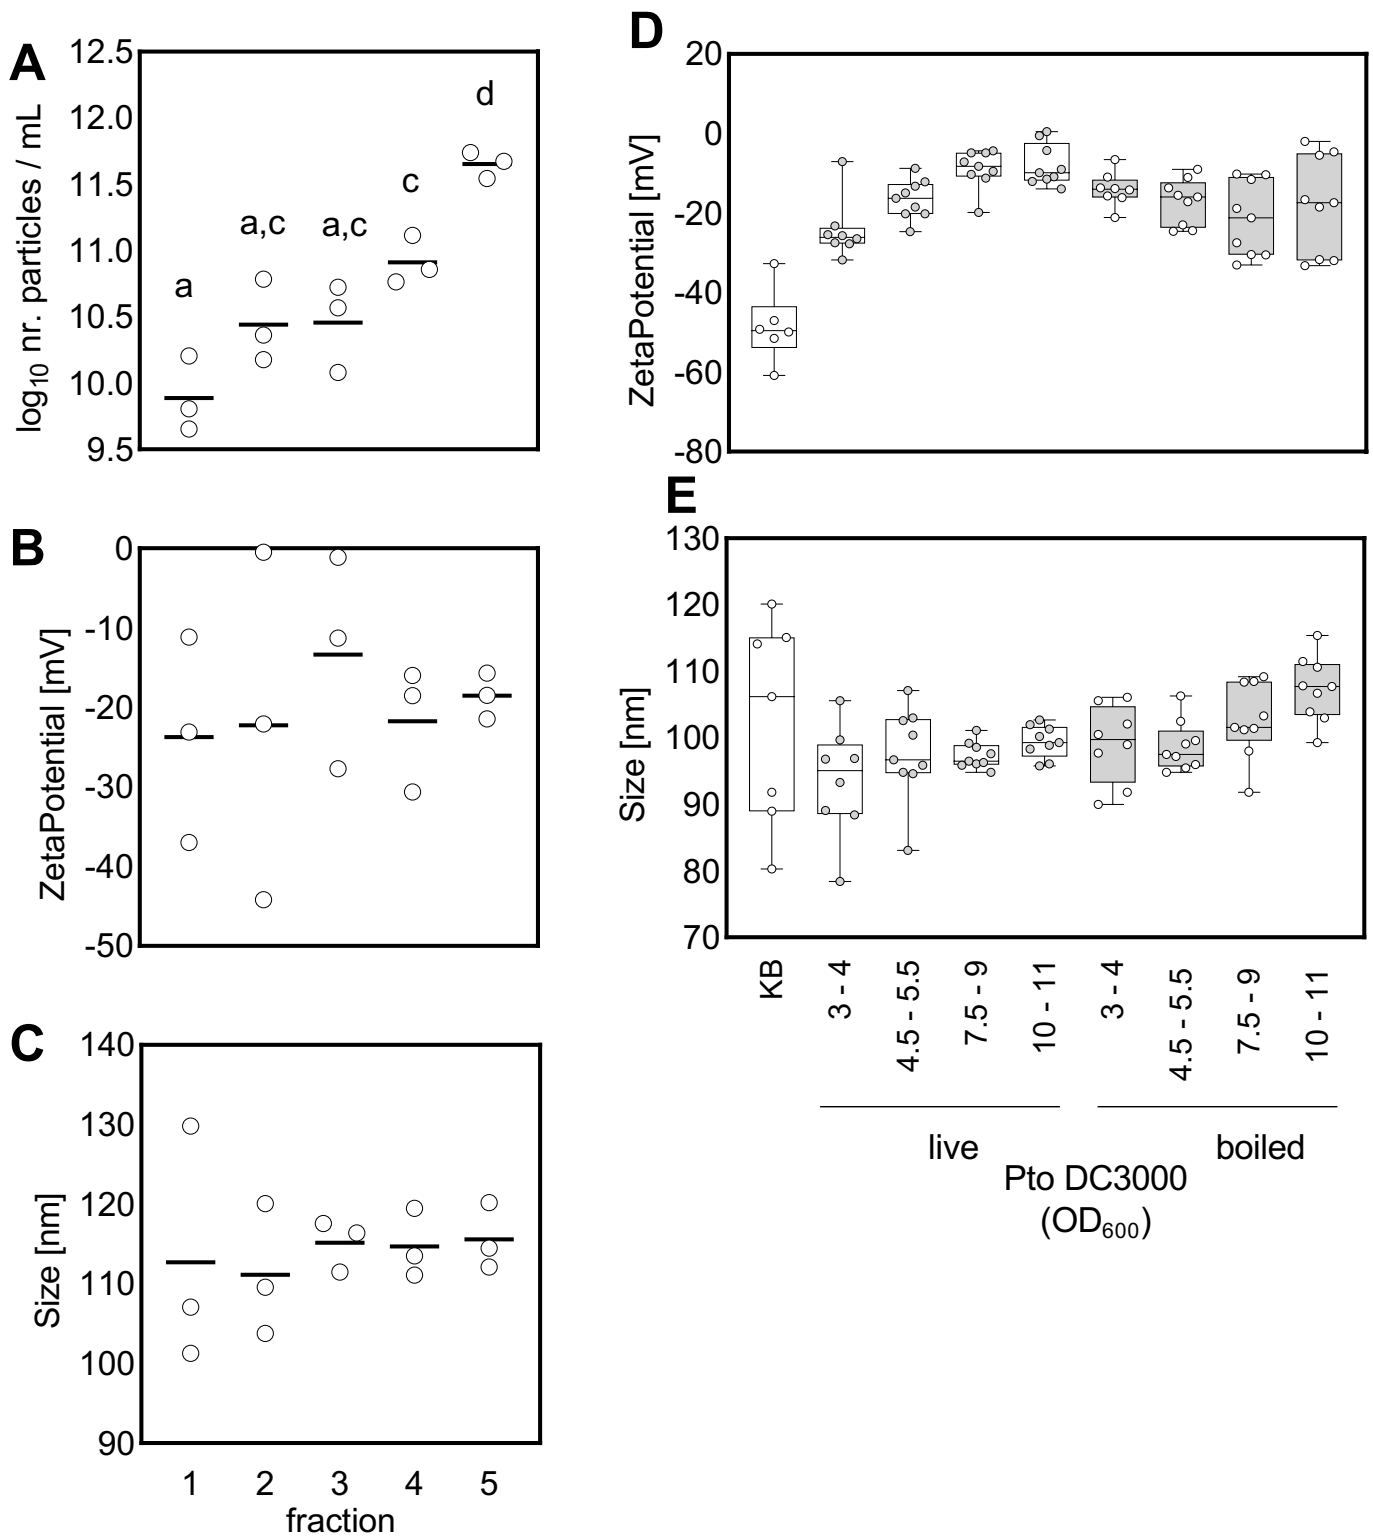

**Figure S6. Biophysical parameters of *Pto* DC3000 EVs across isolation methods. A-C)** NTA measurements of particle concentration (A),  $\zeta$ -potential (B) and size (C) of *Pto* DC3000 EVs collected from each step of gradient enrichment. **D-E)** NTA analysis of particle  $\zeta$ -potential (D) and size (E) of *Pto* DC3000 EVs from fluid samples before (live) and after boiling. Each dot represents an independent sample.
